# **Prevalence of *katG* and *inhA* mutations in genes associated with isoniazid resistance in *Mycobacterium tuberculosis* clinical isolates in Cameroon**

Vanessa Ninkeh Nono, Edouard Akono Nantia, Awelani Miranda Mutshembele, Sorelle Nguimfack Teagho, Yannick Willy Kamdem Simo, Brenda Shile Takong, Yvonne Josiane Djeugoue, Yannick Patrick Assolo, Suzanne Magloire Ongboulal, Stanley Nkemnji Awungafac, Sara Eyangoh, Ndivuhu Agnes Makhado, Eric Mensah, Valerie Flore Donkeng Donfack

## **Corresponding Author:**

Vanessa Ninkeh Nono  
Email: [vanessa.nono@mrc.ac.za](mailto:vanessa.nono@mrc.ac.za)

## **Withdrawal statement**

This manuscript has been withdrawn by the authors as it was submitted and made public without the full consent of all the authors. Therefore, the authors do not wish this work to be cited as reference for the project. If you have any questions, please contact the corresponding author.
